# Supplementary material for: Effects of hydrogen-rich water on aging periodontal tissues in rats
Source: Springer Nature journal article supplement (doi:10.1038/srep05534), 2014-07-02
Supplement: 41598_2014_BFsrep05534_MOESM1_ESM.pdf [file 41598_2014_BFsrep05534_MOESM1_ESM.pdf]

## **Supplementary information**

### **Effects of hydrogen-rich water on aging periodontal tissues in rats**

Takaaki Tomofuji, Yuya Kawabata, Kenta Kasuyama, Yasumasa Endo,  
Toshiki Yoneda, Mayu Yamane, Tetsuji Azuma, Daisuke Ekuni & Manabu Morita

Table. Nutrient composition of the experimental diet (Oriental MF diet) per 100 g

|                      |                              |       |
|----------------------|------------------------------|-------|
| Nutrient composition | Moisture (g)                 | 7.9   |
|                      | Crude protein (g)            | 23.1  |
|                      | Crude fat (g)                | 5.1   |
|                      | Crude ash (g)                | 5.8   |
|                      | Crude fiber (g)              | 2.8   |
|                      | Nitrogen free extract (g)    | 55.3  |
|                      | Calories (kcal)              | 359   |
| Vitamins             | Vitamin A (IU)*              | 1283  |
|                      | Vitamin D <sub>3</sub> (IU)  | 137   |
|                      | Vitamin E (mg)               | 9.1   |
|                      | Vitamin K <sub>3</sub> (mg)† | 0.04  |
|                      | Vitamin B <sub>1</sub> (mg)  | 2.05  |
|                      | Vitamin B <sub>2</sub> (mg)  | 1.1   |
|                      | Vitamin C (mg)               | 4     |
|                      | Vitamin B <sub>6</sub> (mg)  | 0.87  |
|                      | Vitamin B <sub>12</sub> (µg) | 5.5   |
|                      | Inositol (mg)                | 439   |
|                      | Biotin (µg)                  | 27    |
|                      | Panthenic acid (mg)          | 2.45  |
|                      | Niacin (mg)                  | 10.61 |
| Choline (g)          | 0.18                         |       |
| Folic acid (mg)      | 0.17                         |       |

|             |                   |      |
|-------------|-------------------|------|
| Minerals    | Calcium (g)       | 1.07 |
|             | Phosphorous (g)   | 0.83 |
|             | Magnesium (g)     | 0.24 |
|             | Sodium (g)        | 0.19 |
|             | Potassium (g)     | 0.90 |
|             | Iron (mg)         | 10.6 |
|             | Aluminum (mg)     | 2.1  |
|             | Copper (mg)       | 0.78 |
|             | Zinc (mg)         | 4.89 |
|             | Cobalt (mg)       | 0.10 |
|             | Manganese (mg)    | 4.84 |
|             | Ca/P              | 1.29 |
|             | Ca/Mg             | 4.50 |
| K/Na        | 4.77              |      |
| Amino acids | Isoleucine (g)    | 0.89 |
|             | Leucine (g)       | 1.74 |
|             | Lysin (g)         | 1.24 |
|             | Methionine (g)    | 0.44 |
|             | Cystein (g)       | 0.36 |
|             | Phenylalanine (g) | 1.04 |
|             | Tyrosine (g)      | 0.68 |
|             | Threonine (g)     | 0.89 |
|             | Tryptophan (g)    | 0.28 |
|             | Valine (g)        | 1.08 |
|             | Arginine (g)      | 1.42 |
|             | Histidine (g)     | 0.60 |
|             | Alanine (g)       | 1.20 |
|             | Aspartic acid (g) | 2.14 |
|             | Glutamic acid (g) | 3.99 |
|             | Glycine (g)       | 1.18 |
| Proline (g) | 1.31              |      |
| Serine (g)  | 1.11              |      |

3-year average (January 2007-December 2009)

\* Retinol

† Amount added

Values are an average of detected lot.
